# Supplementary material for: Uniform fluorescent photonic crystal supraballs generated from nanocrystal-loaded hydrogel microspheres
Source: Royal Society of Chemistry journal article supplement (doi:10.1039/c0jm00400f), 2010-01-01
Supplement: c0jm00400f.pdf [file c0jm00400f.pdf]

## ELECTRONIC SUPPORTING INFORMATION

### Uniform Fluorescent Photonic Crystal Supraballs Generated from Nanocrystals Loaded Hydrogel Microspheres

Ziyi Yu, Li Chen, Su Chen\*

State Key Laboratory of Material-Oriented Chemical Engineering and College of Chemistry and Chemical Engineering, Nanjing University of Technology, No. 5 Xin Mofan Rd., Nanjing, Jiangsu 210009 (P.R. China)

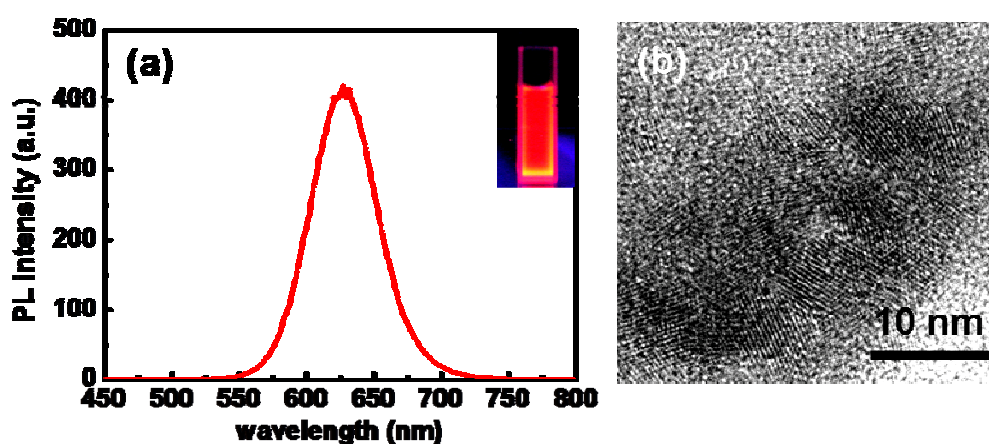

**Fig. S1.** (a) Photoluminescence emission spectra and fluorescence images of CdTe NCs. (b) High-resolution TEM image of CdTe NCs.

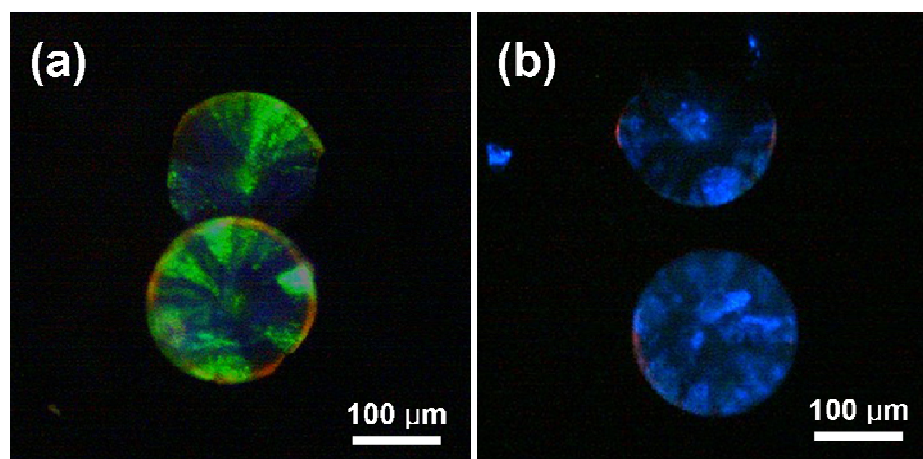

**Fig. S2.** Cross-sectional optical microscopy images of fluorescent PC supraballs. The cross-section of supraballs exhibit brilliant color of green and blue when they are assembly formed by hybrid microspheres of two different diameters, 230, and 190 nm, respectively.
